# Supplementary material for: Two-dimensional cyano-bridged coordination polymer of Mn(H2O)2[Ni(CN)4]: structural analysis and proton conductivity measurements upon dehydration and rehydration
Source: Royal Society of Chemistry journal article supplement (doi:10.1039/c8ce01400k), 2018-01-01
Supplement: c8ce01400k1.pdf [file c8ce01400k1.pdf]

Supplementary Information

## Two-dimensional cyano-bridged coordination polymer of $\text{Mn}(\text{H}_2\text{O})_2[\text{Ni}(\text{CN})_4]$ : structural analysis and proton conductivity measurements upon dehydration and rehydration

Azhar Alowasheir,<sup>a,b</sup> Satoshi Tominaka<sup>a\*</sup>, Yusuke Ide<sup>a</sup>, Yusuke Yamauchi<sup>c,d</sup>  
and Yoshitaka Matsushita<sup>e</sup>

*a. International Center for Materials Nanoarchitectonics (WPI-MANA), National Institute for Materials Science (NIMS), 1-1 Namiki, Tsukuba, Ibaraki 305-0044, Japan.*

*b. Faculty of Science and Engineering, Waseda University, 3-4-1 Okubo, Shinjuku, Tokyo, 169-8555, Japan.*

*c. School of Chemical Engineering & Australian Institute for Bioengineering and Nanotechnology (AIBN), The University of Queensland, Brisbane, QLD 4072, Australia.*

*d. Department of Plant & Environmental New Resources, Kyung Hee University, 1732 Deogyong-daero, Giheung-gu, Yongin-si, Gyeonggi-do 446-701, South Korea.*

*e. Materials Analysis Station, National Institute for Materials Science, 1-2-1 Sengen, Tsukuba, Ibaraki 305-0047, Japan.*

### Contents

1. Photograph of single crystal  $[\text{Mn}(\text{H}_2\text{O})_2\text{Ni}(\text{CN})_4] \cdot 3\text{H}_2\text{O}$
2. Structure data obtained by single crystal and powder data for as-prepared, phase I and phase II.
3. Crystal structure of phase I obtained by SXRD.
4. Thermogravimetric analysis.
5. Distance between oxygen bond and Ni–O coordination bond on phase I and phase II.
6. Crystal structure of re-hydrated single crystal.
7. Rietveld analysis result of re-hydration sample.
8. Hydrogen bonding network and distances in phase I.
9. Image of setup for single crystal impedance analyses.
10. Single crystal AC impedance data and analyses

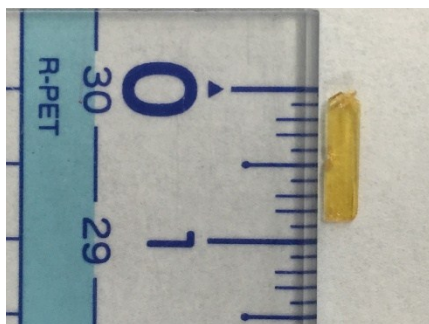

**Fig.S1** Photograph of the  $[\text{Mn}(\text{H}_2\text{O})_2\text{Ni}(\text{CN})_4]\cdot 3\text{H}_2\text{O}$  single crystal as-synthesis

**Table S1** Lattice constants obtained by the SC-XRD and PXRD data

| Compound                         | Phase I (293 K)                      | Phase I (113 K)                      | Phase I (298 K)                            | Phase II (298 K)                           | Phase I (298 K)<br>Rehydrated phase                      |
|----------------------------------|--------------------------------------|--------------------------------------|--------------------------------------------|--------------------------------------------|----------------------------------------------------------|
| Formula                          | $\text{MnNiC}_4\text{N}_4\text{O}_6$ | $\text{MnNiC}_4\text{N}_4\text{O}_6$ | $\text{MnNiC}_4\text{N}_4\text{O}_{9.259}$ | $\text{MnNiC}_4\text{N}_4\text{O}_{4.604}$ | $\text{Mn}_{0.93}\text{NiC}_4\text{N}_4\text{O}_{9.373}$ |
| Space group                      | Pnma                                 | Pnma                                 | Pnma                                       | Imma                                       | Pnma                                                     |
| a (Å)                            | 12.3058(3)                           | 12.0750(3)                           | 12.30625(17)                               | 14.5229(15)                                | 12.3066(9)                                               |
| b (Å)                            | 14.1261(3)                           | 14.0779(3)                           | 14.12662(2)                                | 7.2962(8)                                  | 14.1272(12)                                              |
| c (Å)                            | 7.3105(2)                            | 7.3144(2)                            | 7.31004(11)                                | 9.0371(10)                                 | 7.3101(6)                                                |
| (°)                              | 90                                   | 90                                   | 90                                         | 90                                         | 90                                                       |
| $\beta$ (°)                      | 90                                   | 90                                   | 90                                         | 90                                         | 90                                                       |
| $\gamma$ (°)                     | 90                                   | 90                                   | 90                                         | 90                                         | 90                                                       |
| V (Å <sup>3</sup> )              | 1270.81(5)                           | 1243.38(5)                           | 1270.82(4)                                 | 957.59(2)                                  | 1270.91(2)                                               |
| R1 (%) / $R_{\text{wp}}$<br>(%)* | 3.93                                 | 2.73                                 | 7.74                                       | 11.39                                      | 6.78                                                     |
| Method                           | SC-XRD                               | SC-XRD                               | Synchrotron<br>HR-PXRD                     | Synchrotron<br>HR-PXRD                     | Synchrotron HR-<br>PXRD                                  |

\*. Reliable indexes: R1 is for SC-XRD and  $R_{\text{wp}}$  is for synchrotron HR-XRD.

**Table.S2** Selected bond lengths (Å) and angles (°) in phase I (determined by SC-XRD) at 293 K.

|          |           |          |            |
|----------|-----------|----------|------------|
| Ni–C1    | 1.8566(8) | Mn–N2    | 2.1950(8)  |
| Ni–C2    | 1.8572(8) | N–C      | 1.1541(11) |
| Mn–O     | 2.2357(8) | N–C      | 1.1529(11) |
| Mn–N1    | 2.1979(8) | Ni–O     | 2.7823(18) |
| O4–Mn–O4 | 180.0     | C2–N2–Mn | 176.06(6)  |
| N1–Mn–N2 | 90.87(4)  | C1–Ni–C2 | 173.94(4)  |
| N2–Mn–N1 | 89.13(4)  | C2–Ni–C2 | 89.04(5)   |
| O4–Mn–N2 | 87.78(4)  | C1–Ni–C1 | 89.83(5)   |
| O4–Mn–N1 | 87.38(3)  | C1–Ni–C2 | 90.25(4)   |
| O4–Mn–N1 | 92.62(3)  | N1–C1–Ni | 175.74(9)  |
| C1–N1–Mn | 158.59(9) | N2–C2–Ni | 177.66(10) |
| C1–Ni–O  | 94.96(4)  |          |            |

**Table.S3** Selected bond lengths (Å) and angles (°) in phase I (determined by HR-PXRD).

|          |            |          |            |
|----------|------------|----------|------------|
| Ni–C1    | 1.8565(9)  | Mn–N2    | 2.1950(10) |
| Ni–C2    | 1.8573 (9) | N–C      | 1.307(15)  |
| Mn–O     | 2.2357(9)  | N–C      | 1.394(14)  |
| Mn–N1    | 2.1980(10) | Ni–O     | 2.792(11)  |
| O4–Mn–O4 | 180.0      | C2–N2–Mn | 124.5(8)   |
| N1–Mn–N2 | 91.4(5)    | C1–Ni–C2 | 177.9(6)   |
| N1–Mn–N2 | 88.5(4)    | C2–Ni–C2 | 89.1(9)    |
| O4–Mn–N2 | 96.0(4)    | C1–Ni–C1 | 86.8(7)    |
| O4–Mn–N1 | 94.2(4)    | C2–Ni–C1 | 91.9(5)    |
| O4–Mn–N2 | 84.0(4)    | N1–C1–Ni | 109.9(9)   |
| O4–Mn–N1 | 85.8(4)    | N2–C2–Ni | 141.5(10)  |
| C1–N1–Mn | 120.3(8)   | C2–Ni–O  | 107.6(5)   |

---

**Table.S4** Selected bond lengths (Å) and angles (°) in phase II (determined by HR-PXRD).

---

|          |           |          |           |
|----------|-----------|----------|-----------|
| Ni-C     | 1.774(18) | Mn-N     | 2.246(15) |
| Mn-O     | 2.229(14) | C-N      | 1.25(3)   |
| Ni-O     | 3.06(2)   | O-Mn-N   | 91.9(6)   |
| O-Mn-O   | 180.0     | C-N-Mn   | 163.9(14) |
| N-Mn-N   | 180.0     | C-Ni-C   | 171.1(14) |
| N1-Mn-N2 | 84.9(8)   | C1-Ni-C2 | 103.4(12) |
| N2-Mn-N2 | 95.1(8)   | C2-Ni-C1 | 75.9(12)  |
| O-Mn-N   | 88.1(6)   | N-C-Ni   | 152.1(16) |

---

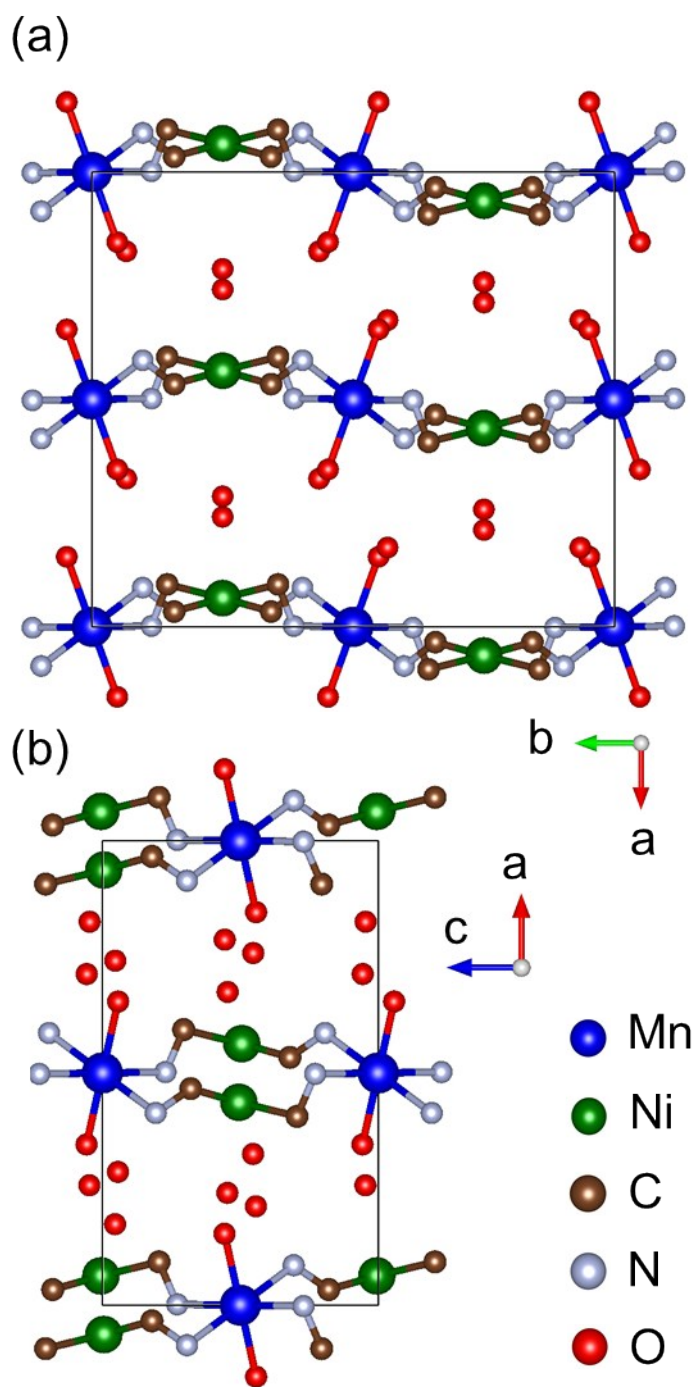

Fig.S2 Crystal structure of phase I (HR=100%) obtained by PXRD.

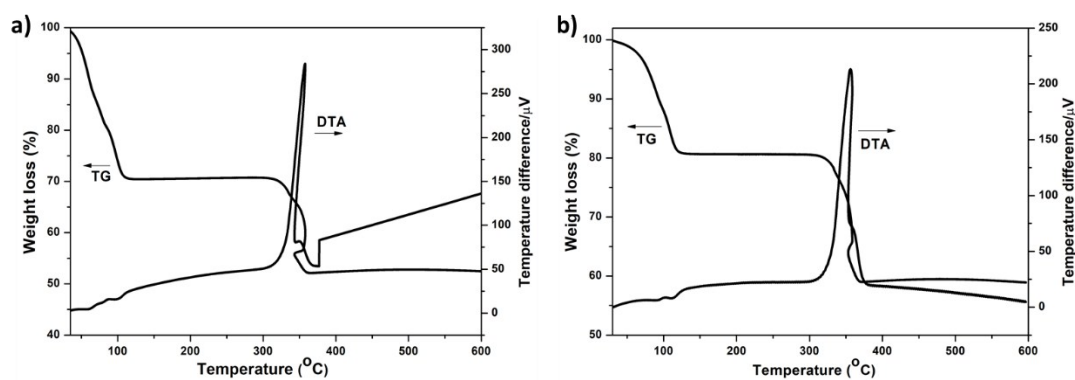

**Fig. S3** Thermogravimetric–differential thermal analysis (TG-DTA) for (a) crystal phase I and (b) crystal phase II. The data were collected in air with a scan rate of 5 °C min<sup>-1</sup>. The gradual water molecules weight losses observed below the 150°C for both phases.

## Phase I

a)

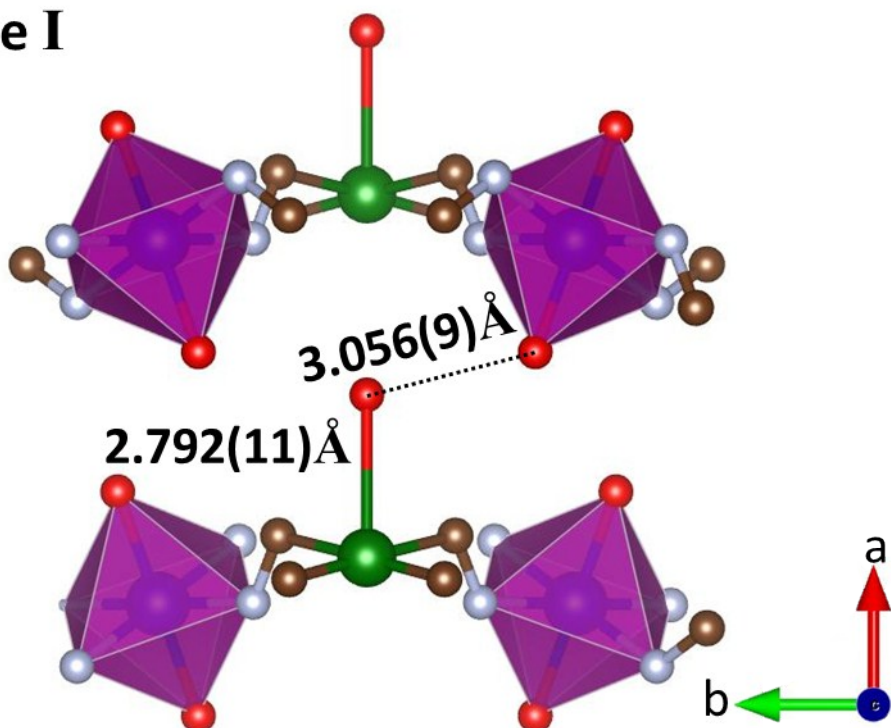

## Phase II

b)

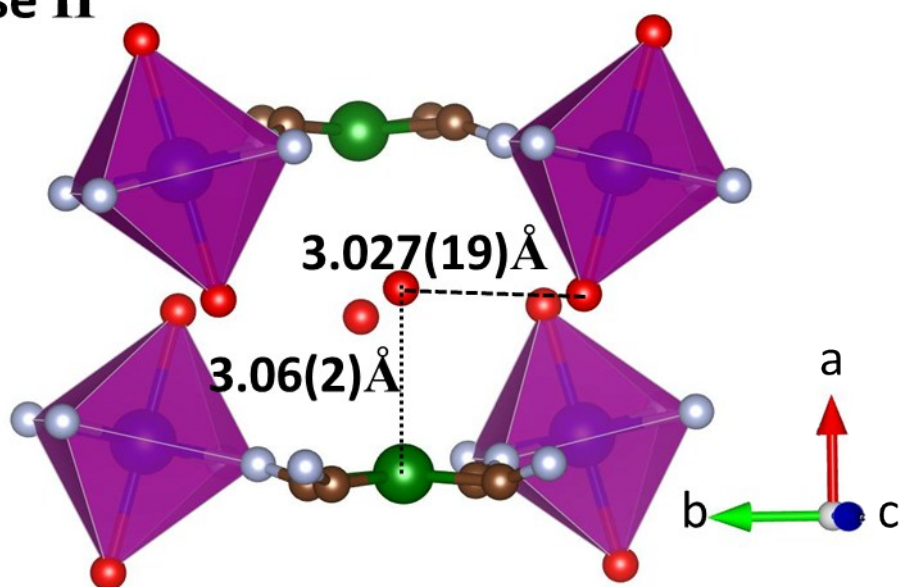

Fig.S4 Distance between oxygen bond and Ni-O coordination bond on a) phase I and b) phase II.

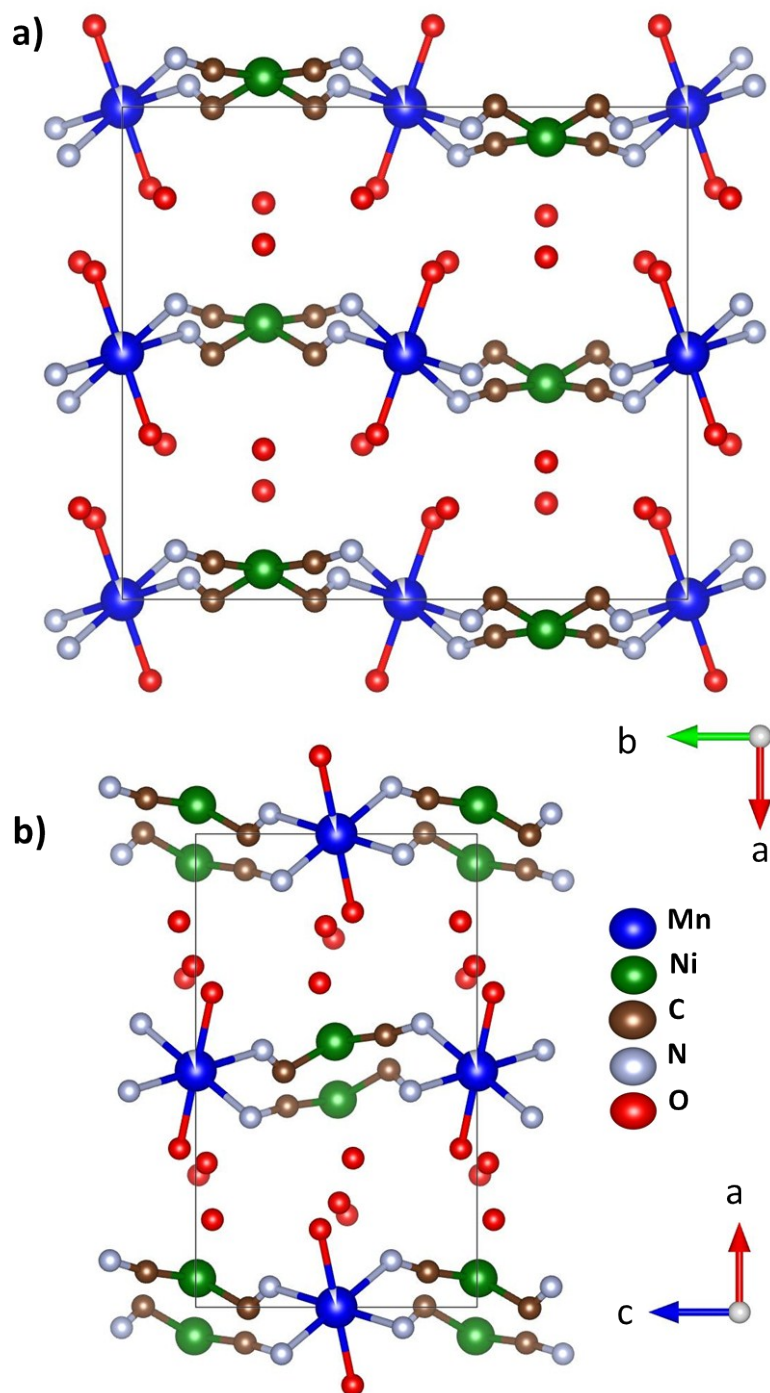

**Fig. S5** Crystal structure of re-hydrated sample (phase I) obtained by PXRD.



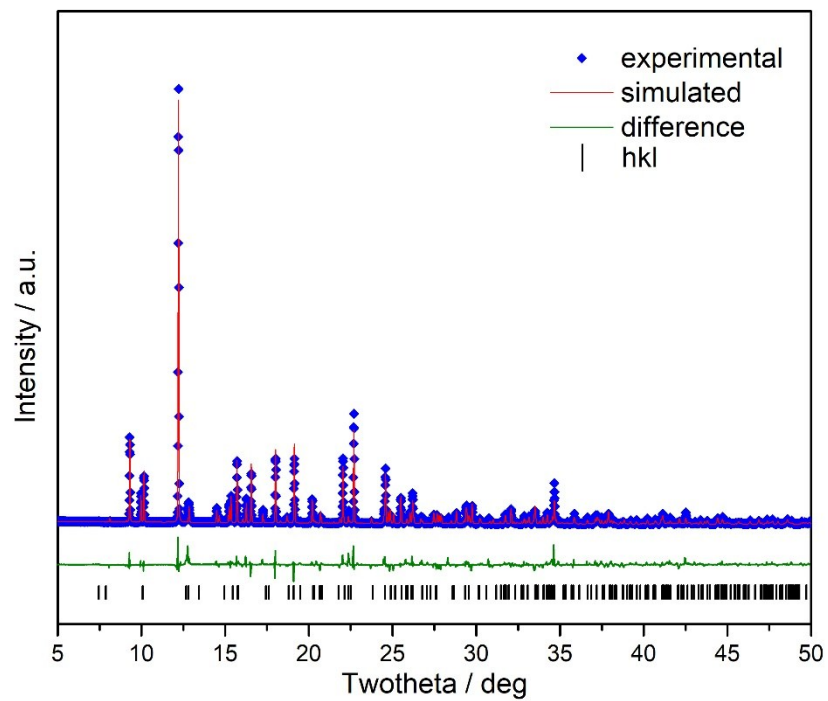

Fig. S6 Rietveld analysis result of the PXRD patterns for rehydrated sample (RH = 100%).

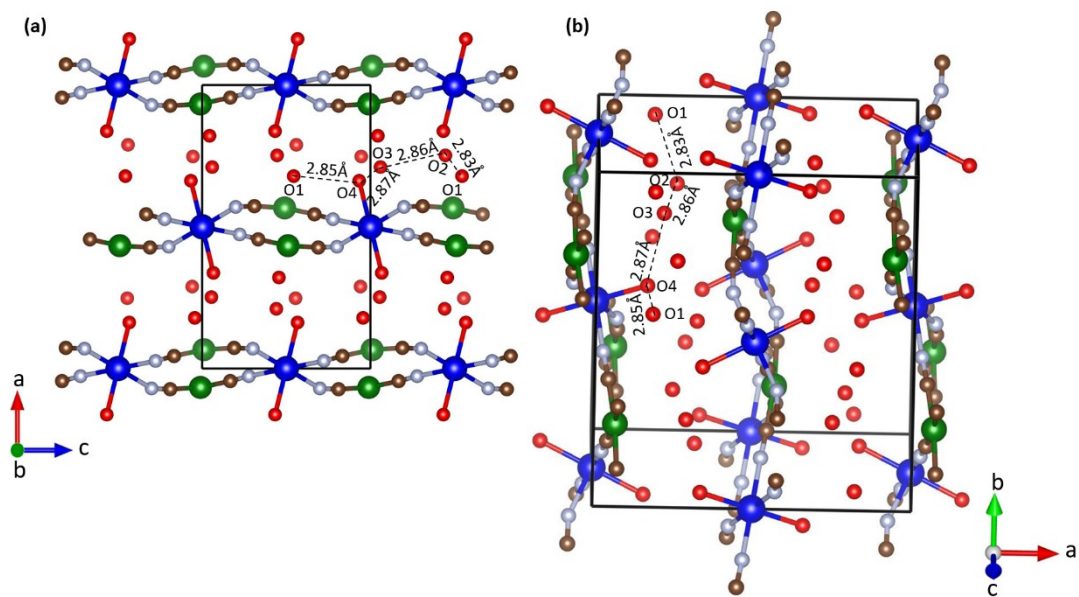

Fig. S7 Hydrogen bonding network and O-O distances in phase I.

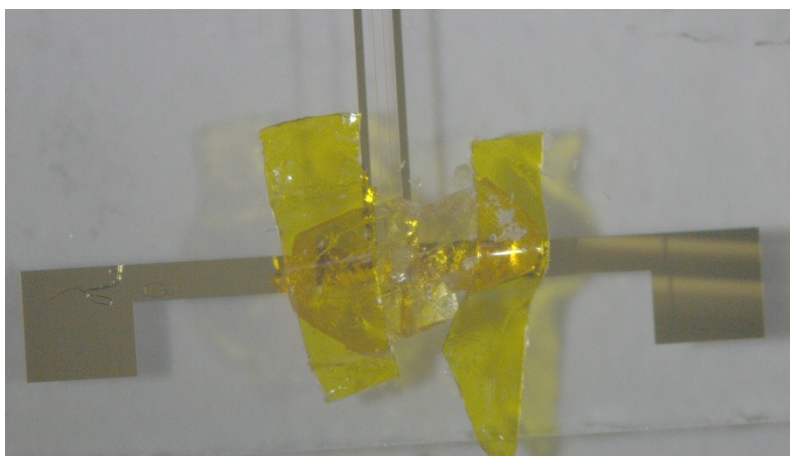

**Fig. S8** Photograph of the microelectrodes for the single-crystal impedance measurement. A crystal (1 mm wide x 0.5 mm thick) was contacted with microelectrodes having a 80 mm gap using a Kapton tape.

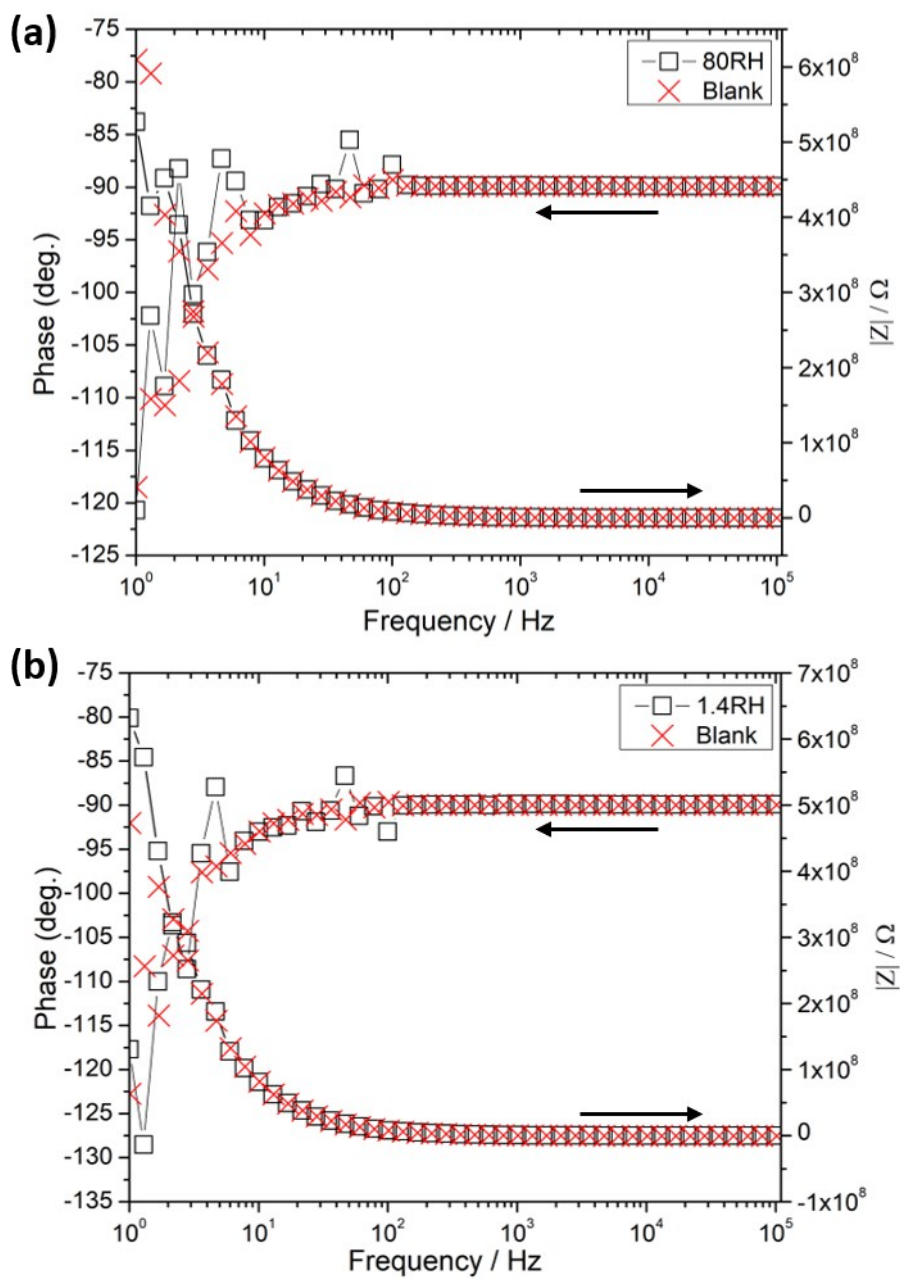

**Fig. S9** Bode plots of impedance data for a  $\text{Mn}(\text{H}_2\text{O})_2[\text{Ni}(\text{CN})_4]$  single crystal measured at (a) RH = 80% and (b) 1.4%.
